# Supplementary material
Source: publisher figshare collection journal article supplement (https://acs.figshare.com/ndownloader/files/4288231)
Supplement: Supplementary file 1 [file 4288231]

# Supporting Information

## Tailoring Spatial Distribution of the Optical Field Intensity in Semitransparent Inverted Organic Solar cells

Chen Tao\*, Guohua Xie, Fanxu Meng, Shengping Ruan\*, and Weiyu Chen

State Key Laboratory on Integrated Optoelectronics, College of Electronic Science  
and Engineering, Jilin University, 2699 Qianjin Street, Changchun, 130012, PR China

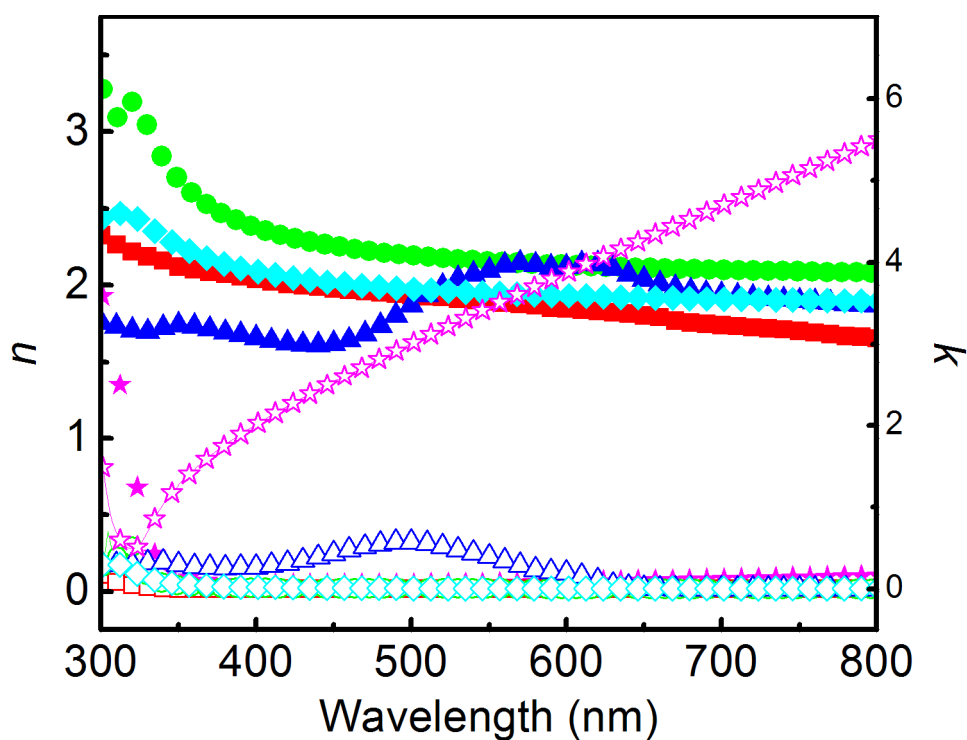

**Figure S1.** The optical constants, including the refractive index ( $n$ ) (solid) and extinction coefficient ( $k$ ) (open), of ITO (square),  $\text{TiO}_2$  (circle), P3HT:PCBM (triangle),  $\text{WO}_3$  (diamond), and Ag (star).
